# Supplementary material
Source: PubMed Central journal article supplement (PMC6712103)
Supplement: 11606_2018_4795_MOESM2_ESM.pdf [file 11606_2018_4795_MOESM2_ESM.pdf]

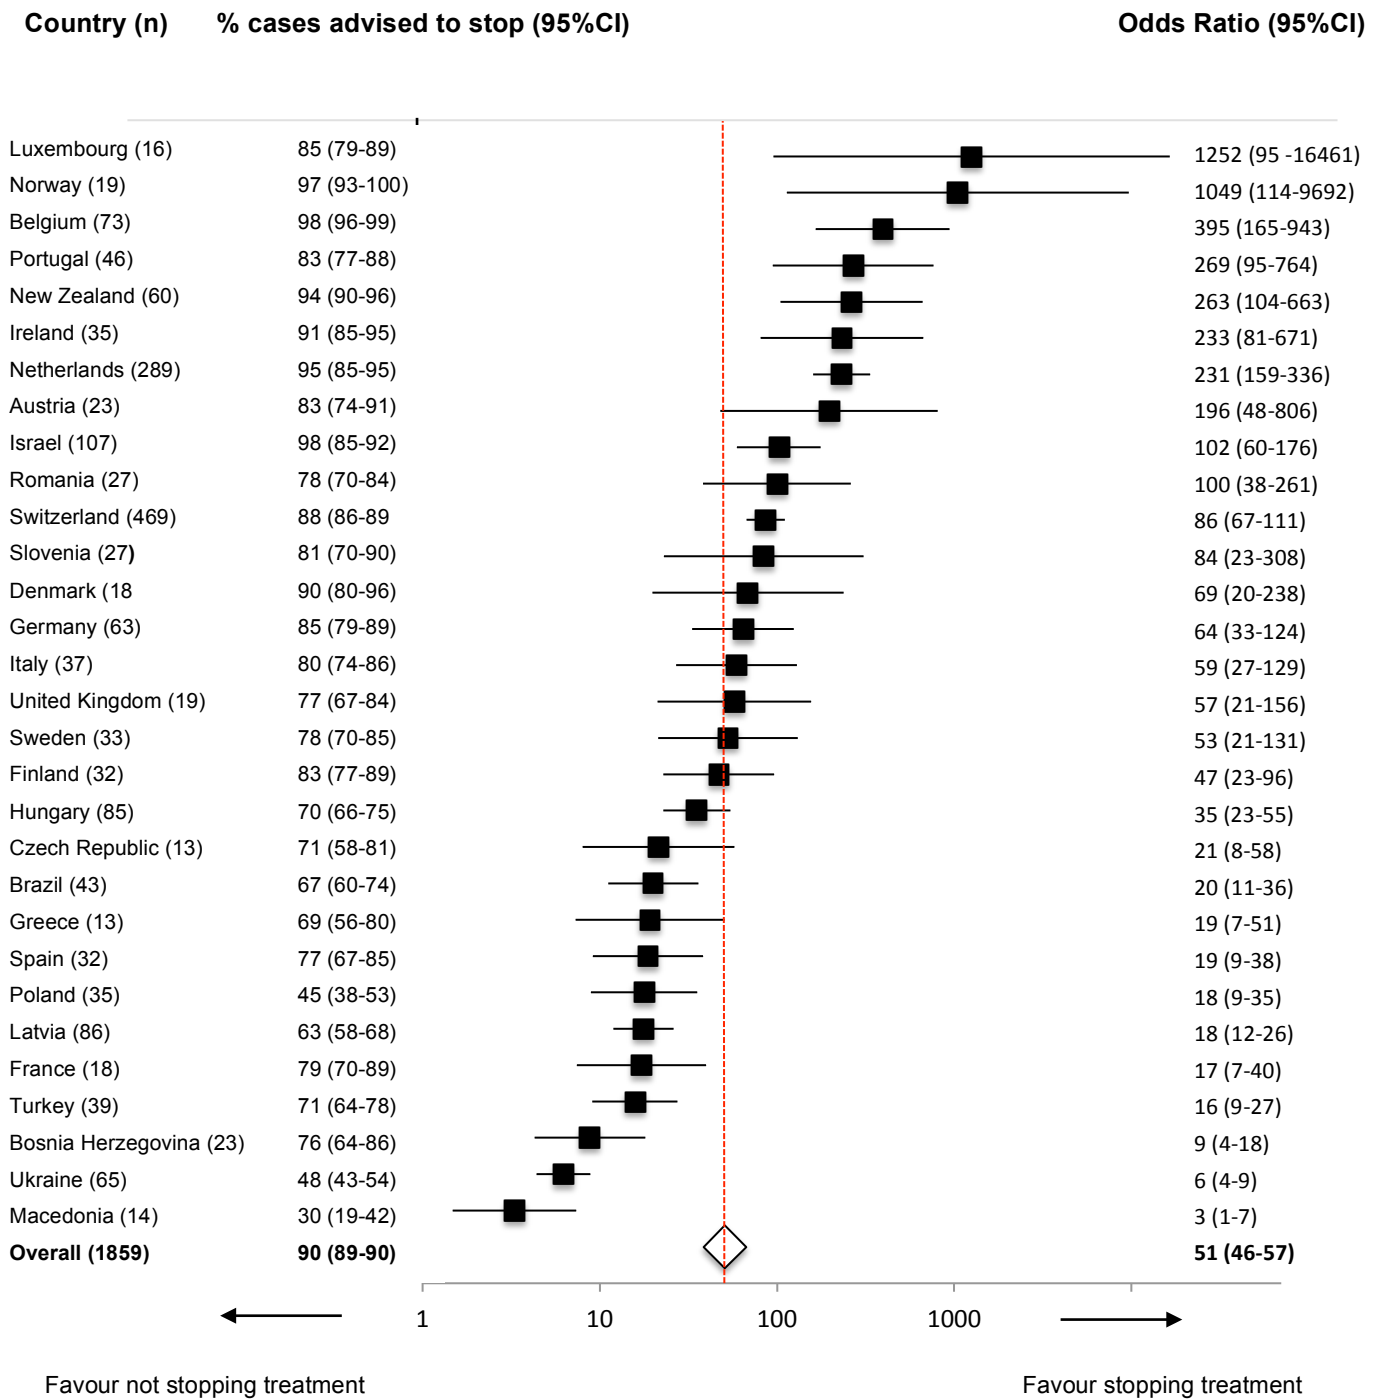

**Figure 1. Odd ratios<sup>1</sup> per country for GPs' advice to stop statin treatment in patients aged > 80 years when life expectancy is < 1 year.**

<sup>1</sup>Adjusted for patient characteristics (frailty, side effects and absence of cardiovascular disease) A mixed-effects model was used to account for multiple assessments of the 8 case per GP.
